# Supplementary material
Source: PubMed Central journal article supplement (PMC2527918)
Supplement: 0805141105_0805141105SI.pdf [file 0805141105_0805141105SI.pdf]

# Supporting Information

Kim et al. 10.1073/pnas.08051411105

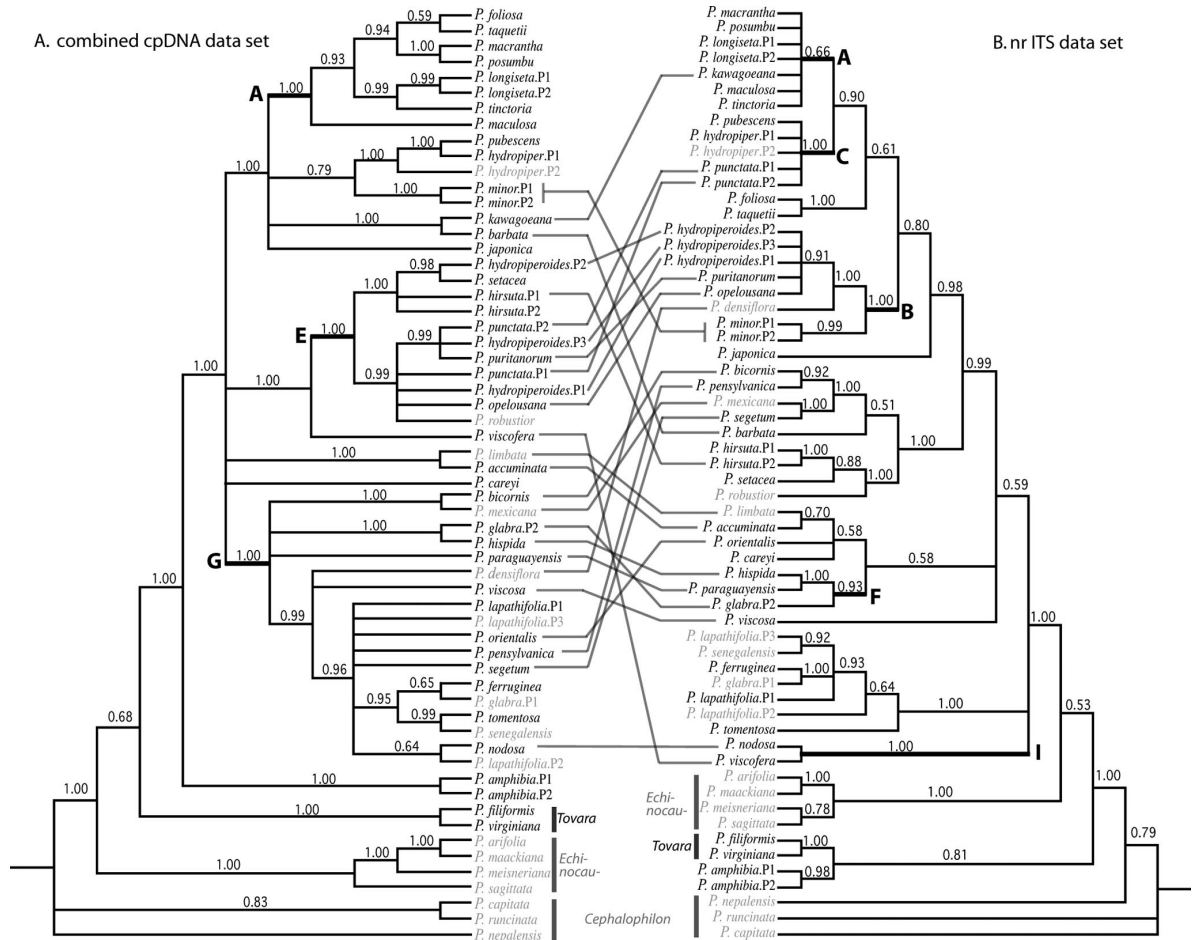

**Fig. S1.** Fifty percent majority-rule consensus tree from Bayesian inference using (A) the combined data set of three chloroplast regions: *psbA-trnH* intergenic spacer, partial *matK*, and *trnL-F*; and (B) the nrITS region. Gray taxa are not included in this study. Clade name with capital letter corresponds to that in Figs. 1–3 in the text. For more detailed discussion and information, see Kim S-T, Donoghue MJ, Incongruence between cpDNA and nrITS trees indicates extensive hybridization within *Eupersicaria* (Polygonaceae). *Am J Bot*, in press.

**Table S1. Voucher information and GenBank accession numbers for *LEAFY* second intron (*PL2int*) sequences**

| Taxon                                                      | Chr. no. (2n)                                                         | Collector(s) and number     | GenBank accession                      |
|------------------------------------------------------------|-----------------------------------------------------------------------|-----------------------------|----------------------------------------|
| <i>Tovara</i> (outgroup)                                   |                                                                       |                             |                                        |
| <i>P. filiformis</i> (Thunb.) Nakai                        | c. 44 <sup>1</sup>                                                    | Kim & Kim Ch-Ko-102         | EU196804, EU196805                     |
| <i>P. virginiana</i> (L.) Gaertn.                          | 44 <sup>1</sup> , 48 <sup>2</sup>                                     | Sultan s.n.                 | EU196866, EU196867                     |
| <i>Eupersicaria</i>                                        |                                                                       |                             |                                        |
| <i>P. accuminata</i> (Kunth) M. Gómez                      | —                                                                     | *Ritter 3876 (NHA)          | EU196792                               |
| <i>P. amphibia</i> (L.) Gray Pop.1                         | 66 <sup>1</sup> , 2, 88 <sup>2</sup> , 96 <sup>2</sup>                | Kim 600                     | EU196793, EU196794                     |
| Pop.2                                                      |                                                                       | Kim & Kim Ch-Ko-91          | EU196795                               |
| <i>P. barbata</i> (L.) Hara                                | 22 <sup>2</sup> , 40 <sup>2</sup> , 60 <sup>2</sup>                   | *Ou & Kao 9463 (GH)         | EU196796                               |
| <i>P. bicornis</i> (Raf.) Nieuwl.                          | —                                                                     | *Lathrop 1290 (GH)          | EU196797, EU196798                     |
| <i>P. careyi</i> (Olney) Greene                            | —                                                                     | *Souther 7-18-92            | EU196799, EU196800                     |
| <i>P. ferruginea</i> (Weddell) Soják                       | 66 <sup>1</sup>                                                       | *Ritter & Ritter 3297 (NHA) | EU196801, EU196802, EU196803           |
| <i>P. foliosa</i> (H. Lindb.) Kitag.                       | 20 <sup>2</sup>                                                       | Kim & Kim Ch-Ko-99          | EU196806                               |
| <i>P. glabra</i> (Willd.) M. Gómez                         | 40 <sup>2</sup> , 60 <sup>2</sup>                                     | *Lundal 10 (GH)             | EU196807, EU196808                     |
| <i>P. hirsuta</i> Small Pop.1                              | 20 <sup>3</sup>                                                       | *Sorrie 9886                | EU196809                               |
| Pop.2                                                      |                                                                       | Kim, Koh & Yoo 20           | EU196810                               |
| <i>P. hispida</i> (Kunth) M. Gómez                         | —                                                                     | *Ritter & Ritter 2941 (NHA) | EU196811, EU196812                     |
| <i>P. hydro Piper</i> (L.) Spach                           | 18 <sup>2</sup> , 20 <sup>2</sup> , 22 <sup>2</sup> , 24 <sup>2</sup> | **MHF.8                     | EU196817                               |
| <i>P. hydro Piperoides</i> (Mich.) Small Pop.1             | 40 <sup>3</sup>                                                       | Kim 670                     | EU196813, EU196814                     |
| Pop.2                                                      |                                                                       | Kim, Koh & Yoo 10           | EU196815                               |
| Pop.3                                                      |                                                                       | Kim & Chae 310              | EU196816                               |
| <i>P. japonica</i> (Meisn.) Nakai                          | 40 <sup>4</sup>                                                       | Kim & Kim Ch-Ko-92          | EU196818, EU196819, EU196820           |
| <i>P. kawagoeana</i> (Makino) Nakai                        | —                                                                     | Kim & Deng Ch-Ko-74         | EU196821, EU196822                     |
| <i>P. laphifolia</i> (L.) Gray                             | 22 <sup>2</sup>                                                       | **NBL.6                     | EU196823                               |
| <i>P. longiseta</i> (Brujin) Moldenke Pop. 1               | 40 <sup>4</sup>                                                       | **ORD.4                     | EU196824, EU196825                     |
| Pop. 2                                                     |                                                                       | Kim & Kim Ch-Ko-84          | EU196826, EU196827                     |
| <i>P. maculosa</i> Gray                                    | c. 40 <sup>2</sup> , 44 <sup>1</sup> , 2                              | Kim, Donoghue & Sultan 11   | EU196830, EU196831                     |
| <i>P. macrantha</i> (Meisn.) Haraldson                     | —                                                                     | Kim & Ma Ch-Ko-41           | EU196828, EU196829                     |
| <i>P. minor</i> (Huds.) Opiz Pop.1                         | 40 <sup>2</sup>                                                       | *Tanaka 5020 (GH)           | EU196832                               |
| Pop.2                                                      |                                                                       | Kim & Chae 320              | EU196833, EU196834                     |
| <i>P. nodosa</i> (Pers.) Opiz Pop.1                        | 22 <sup>1</sup> , 40 <sup>5</sup>                                     | Sultan & Heschel 7-18-01    | EU196835                               |
| Pop.2                                                      |                                                                       | Kim 665                     | EU196836, EU196837                     |
| <i>P. opelousana</i> (Riddell) Small                       | 40 <sup>3</sup>                                                       | Kim & Lundgren 10           | EU196838, EU196839                     |
| <i>P. orientalis</i> (L.) Spach                            | 22 <sup>1</sup> , 2                                                   | Kim & Ma Ch-Ko-34           | EU196840                               |
| <i>P. paraguayensis</i> (Wedd) Kim & Donoghue              | —                                                                     | *Ritter 3919 (NHA)          | EU196841, EU196842                     |
| <i>P. pennsylvanica</i> (L.) M. Gómez                      | c. 80 <sup>2</sup>                                                    | Kim, Donoghue & Sultan 14   | EU196843, EU196844, EU196845, EU196846 |
| <i>P. posumbu</i> (Buch.-Ham. ex D. Don) H. Gross          | 40 <sup>2</sup> , 4                                                   | Kim & Deng Ch-Ko-46         | EU196847, EU196848                     |
| <i>P. pubescens</i> (Blume) Hara                           | 44 <sup>6</sup>                                                       | Kim & Deng Ch-Ko-75         | EU196849                               |
| <i>P. punctata</i> (Elliott) Small Pop.1                   | 40 <sup>1</sup> , 5                                                   | Kim 560                     | EU196850, EU196851                     |
| Pop.2                                                      |                                                                       | Kim, Koh & Yoo 30           | EU196852, EU196853                     |
| Pop.3                                                      |                                                                       | Kim, Donoghue & Sultan 20   | EU196854                               |
| <i>P. puritanorum</i> (Fern.) Soják                        | 60 <sup>5</sup>                                                       | **LP.6                      | EU196855, EU196856, EU196857           |
| <i>P. segetum</i> (Kunth) Small                            | —                                                                     | *Crow 5967 (NHA)            | EU196858                               |
| <i>P. setacea</i> (Baldwin) Small                          | 20 <sup>3</sup>                                                       | Kim, Koh & Yoo 40           | EU196859, EU196860                     |
| <i>P. taquetii</i> (H. Lev.) Koidz.                        | —                                                                     | *Murata & Terao 1461 (GH)   | EU196861                               |
| <i>P. tinctoria</i> (Ait.) H. Gross                        | 40 <sup>1</sup>                                                       | Kim Ch-Ko-88                | EU196862, EU196863                     |
| <i>P. tomentosa</i> E. P. Bicknell                         | 22 <sup>1</sup> , 40 <sup>5</sup>                                     | Kim & Chae Cr-40            | EU196864, EU196865                     |
| <i>P. viscofera</i> (Makino) H. Gross ex Nakai             | 24 <sup>2</sup>                                                       | Kim Ch-Ko-85                | EU196868                               |
| <i>P. viscosa</i> (Buch.-Ham. ex D. Don) H. Gross ex Nakai | 22 <sup>6</sup>                                                       | Kim & Ma Ch-Ko-35           | EU196869                               |

Samples are deposited in Yale University Herbarium except as indicated (GH, Gray Herbarium, Harvard University; NHA, University New Hampshire Herbarium). *P.*, *Persicaria*; Pop., Population; c., circa; s.n., without number. References for chromosome (Chr.) numbers: <sup>1</sup> = ref. 2; <sup>2</sup> = index to plant chromosome numbers from Missouri Botanical Garden's w3TROPICOS ([www.mobot.org](http://www.mobot.org)), <sup>3</sup> = ref. 3, <sup>4</sup> = ref. 4, <sup>5</sup>; unpublished counts by S.-T. Kim, <sup>6</sup> = ref. 5.

\*Herbarium specimen.

\*\*Inbred line cultivated at Wesleyan University by Sultan (1).

1. Sultan SE, Wilczek AM, Bell DL, Hand G (1998) Physiological response to complex environments in annual *Polygonum* species of contrasting ecological breadth. *Oecologia* 115:564–578.
2. Jaretsky R (1928) Histologische und karyologische studien an Polygonaceen. *Jahrb f wiss Botanik* 69:357–490.
3. McDonald CB (1980) A biosystematic study of the *Polygonum hydro Piperoides* (Polygonaceae) complex. *Am J Bot* 67:664–670.
4. Doida Y (1960) Cytological studies in *Polygonum* and related genera I. *Bot Mag Tokyo* 37:337–340.
5. Sugiura T (1936) Studies on the chromosome number in higher plants, with special reference to cytokinesis, I. *Cytologia* 7:544–595.
